# Supplementary material for: Structural characterization, solution stability, and potential health and environmental effects of the Nano-TiO2 bioencapsulation matrix and the model product of its biodegradation TiBALDH
Source: Royal Society of Chemistry journal article supplement (doi:10.1039/c2ra20388j), 2012-01-01

## Electronic Supplementary

# Structural Characterization, Solution Stability, and Potential Health and Environmental Effects of the Nano-TiO<sub>2</sub> Bioencapsulation Matrix and the Model Product of its Biodegradation TiBALDH

Nicole Groenke,<sup>‡,§</sup> Gulaim A. Seisenbaeva,<sup>‡</sup> Vitaliy Kaminsky,<sup>‡</sup> Boris Zhivotovsky,<sup>‡</sup>  
Benedikt Kost,<sup>§</sup> Vadim G. Kessler<sup>‡\*</sup>

<sup>‡</sup> Department of Chemistry, SLU BioCenter, Box 7015, 75007 Uppsala, Sweden;

<sup>§</sup> Department of Plant Biology and Forest Pathology, SLU BioCenter, Box 7082, 75007

Uppsala, Sweden; <sup>‡</sup> Department of Toxicology, Institute of Environmental Medicine,

Karolinska Institutet, Box 210, 17177 Stockholm, Sweden

Figure FS1 TGA of Captigel derived xerogel

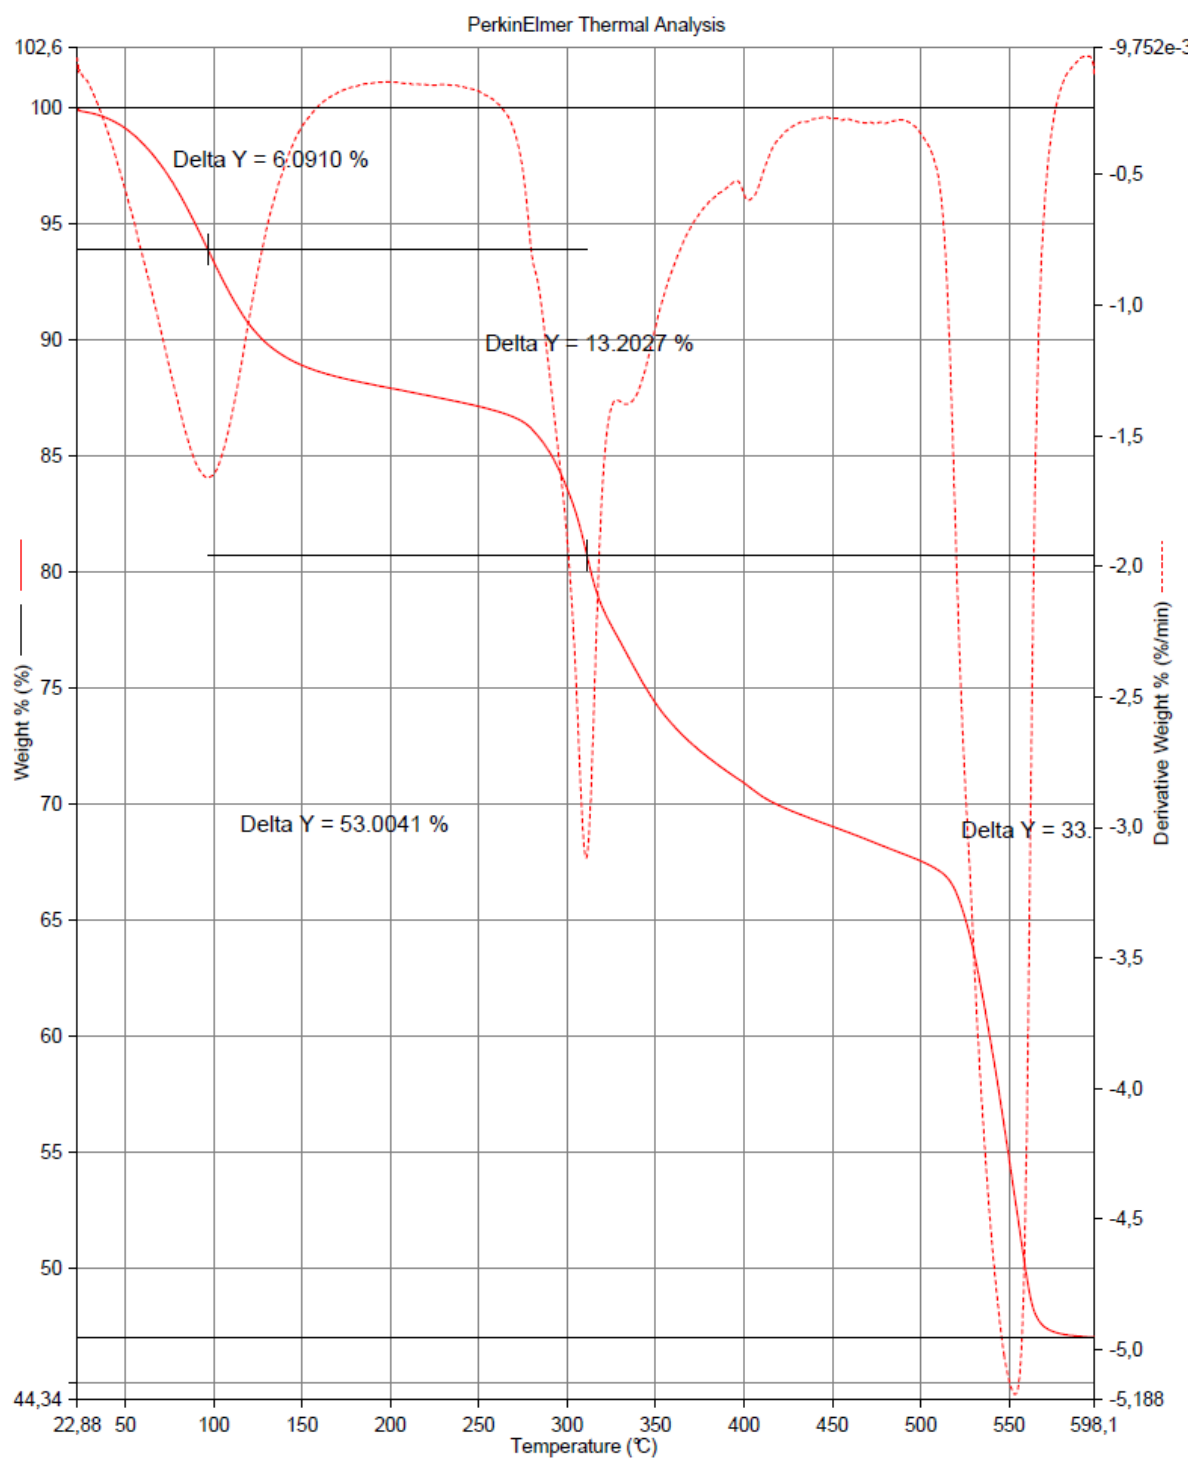

Figure FS2 X-ray powder pattern of the  $\text{TiO}_2$  powder produced by heat treatment of CaptiGel at  $500^\circ\text{C}$

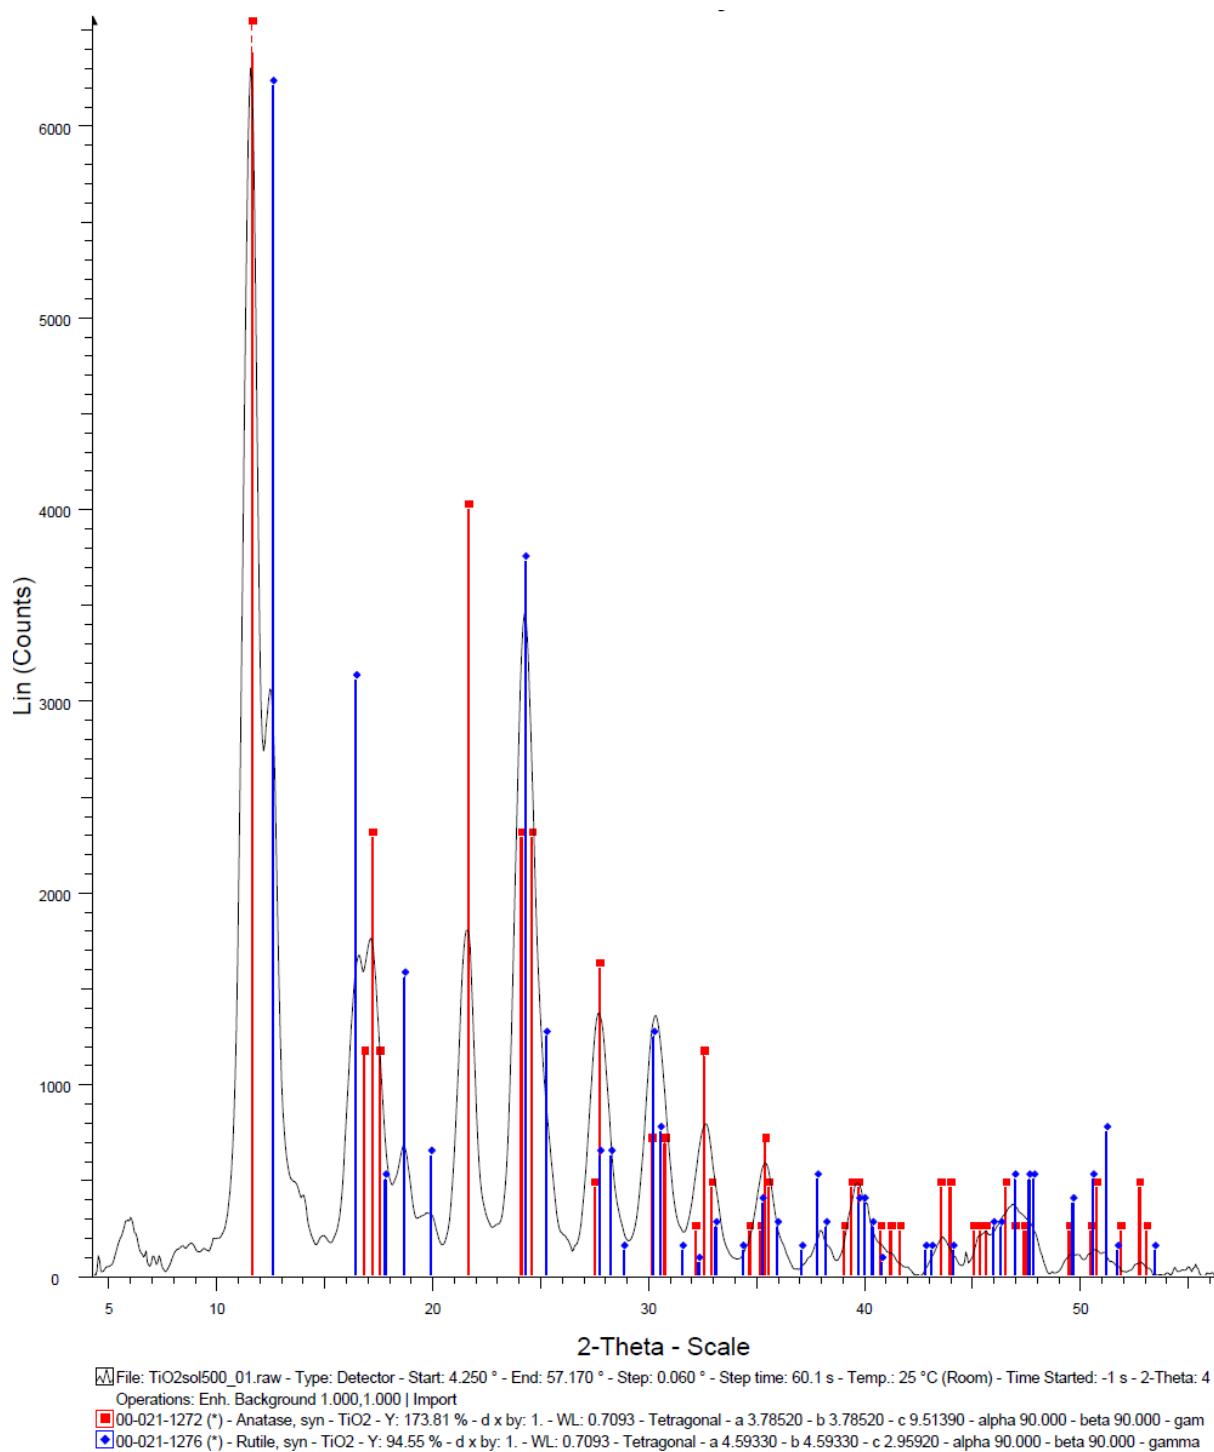

Figure FS3 Phase-corrected Fourier transformed EXAFS spectra of CaptiGel (a, this work) and of crystalline anatase (b, reprinted from R. Bouchet, A. Weibel, P. Knauth, G. Mountjoy, A.V. Chadwick, Chem. Mater. 2003, 15, 4996-5002), in nanopowder (solid line) and bulk sample (dotted line).

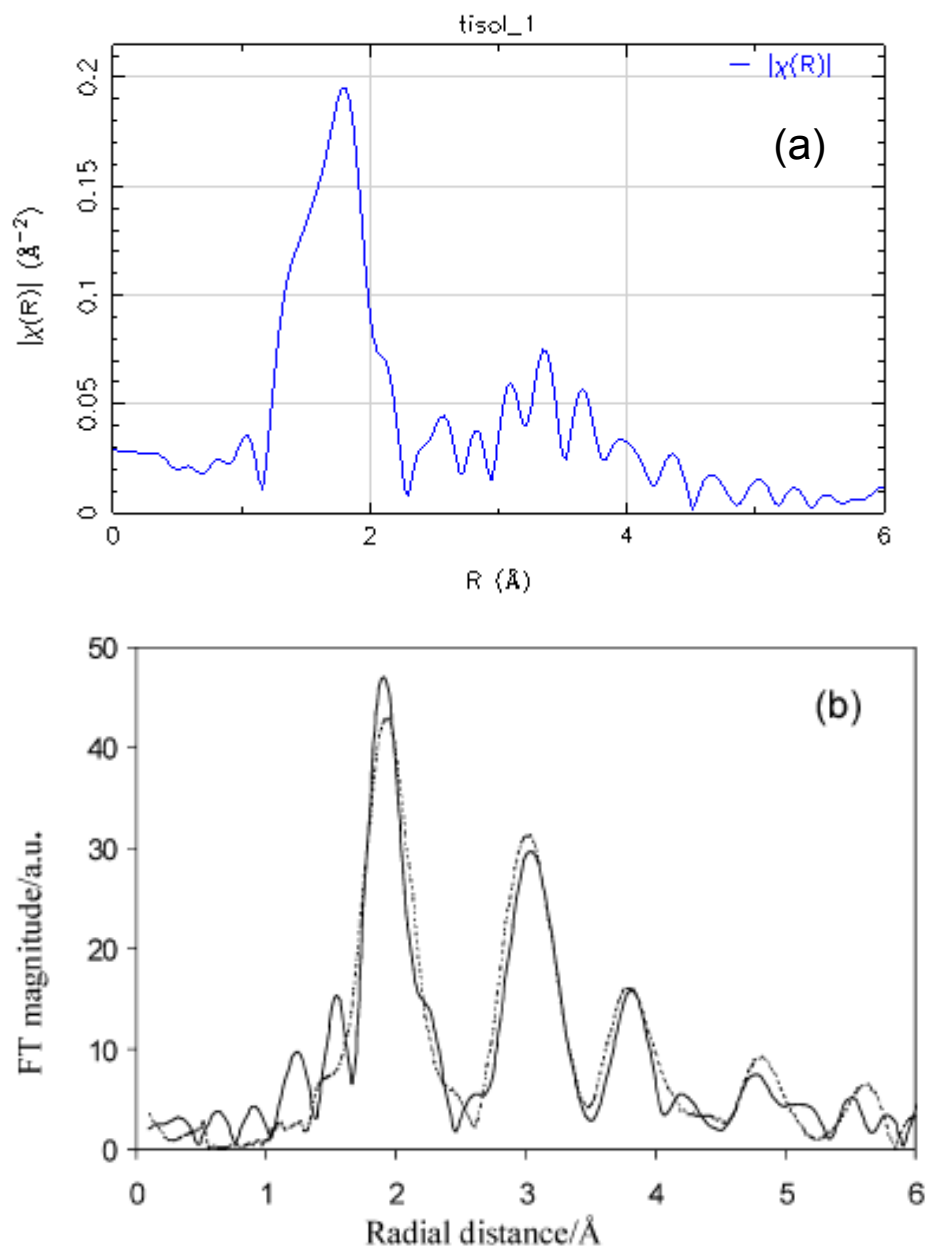

**Table TS1 Size-measurement of TiO<sub>2</sub>, non-dispersed and ultra sonificated**

| Direct Run<br>Non-dispersed |                   |                    |      |                    |      |                    |     | Direct Run<br>Dispersed |                    |      |                    |      |                    |      |  |
|-----------------------------|-------------------|--------------------|------|--------------------|------|--------------------|-----|-------------------------|--------------------|------|--------------------|------|--------------------|------|--|
|                             | Z-Ave<br>(dia.nm) | Peak 1<br>(dia.nm) | %    | Peak 2<br>(dia.nm) | %    | Peak 3<br>(dia.nm) | %   | Z-Ave<br>(dia.nm)       | Peak 1<br>(dia.nm) | %    | Peak 2<br>(dia.nm) | %    | Peak 3<br>(dia.nm) | %    |  |
| 1                           | 59,98             | 151,4              | 80,7 | 6,605              | 13,3 | 24,41              | 4,9 | 26,71                   | 129,3              | 75,3 | 5,079              | 19,6 | 0                  | 5,1  |  |
| 2                           | 61,36             | 142,6              | 77,3 | 5,519              | 9,8  | 15,49              | 9,7 | 24,24                   | 120,7              | 59,2 | 4,654              | 19   | 19,38              | 17,6 |  |
| 3                           | 61,27             | 134,3              | 77,9 | 4,011              | 13,2 | 10,94              | 5,1 | 23,41                   | 114,6              | 58,4 | 4,485              | 18,9 | 17,04              | 18,2 |  |

  

| 48 h delay<br>Non-dispersed |                   |                    |    |                    |      |                    |      | 48 h delay<br>Dispersed |                    |      |                    |      |                    |      |  |
|-----------------------------|-------------------|--------------------|----|--------------------|------|--------------------|------|-------------------------|--------------------|------|--------------------|------|--------------------|------|--|
|                             | Z-Ave<br>(dia.nm) | Peak 1<br>(dia.nm) | %  | Peak 2<br>(dia.nm) | %    | Peak 3<br>(dia.nm) | %    | Z-Ave<br>(dia.nm)       | Peak 1<br>(dia.nm) | %    | Peak 2<br>(dia.nm) | %    | Peak 3<br>(dia.nm) | %    |  |
| 1                           | 73,42             | 125,6              | 68 | 6,067              | 19,2 | 22,06              | 10,8 | 29,39                   | 151,4              | 61,1 | 4,763              | 17,5 | 21,93              | 17,5 |  |
| 2                           | 48,53             | 154,1              | 66 | 5,04               | 15,5 | 24,92              | 15,4 | 63,08                   | 124,6              | 56,7 | 4,906              | 16,9 | 19,49              | 16,9 |  |
| 3                           | 86,25             | 140,9              | 71 | 4,364              | 13,8 | 15,52              | 12,7 | 30,65                   | 123,5              | 63,3 | 4,987              | 17,5 | 17,8               | 17,5 |  |

Figure FS4 TGA of air-dried crystalline TiBALDH sample

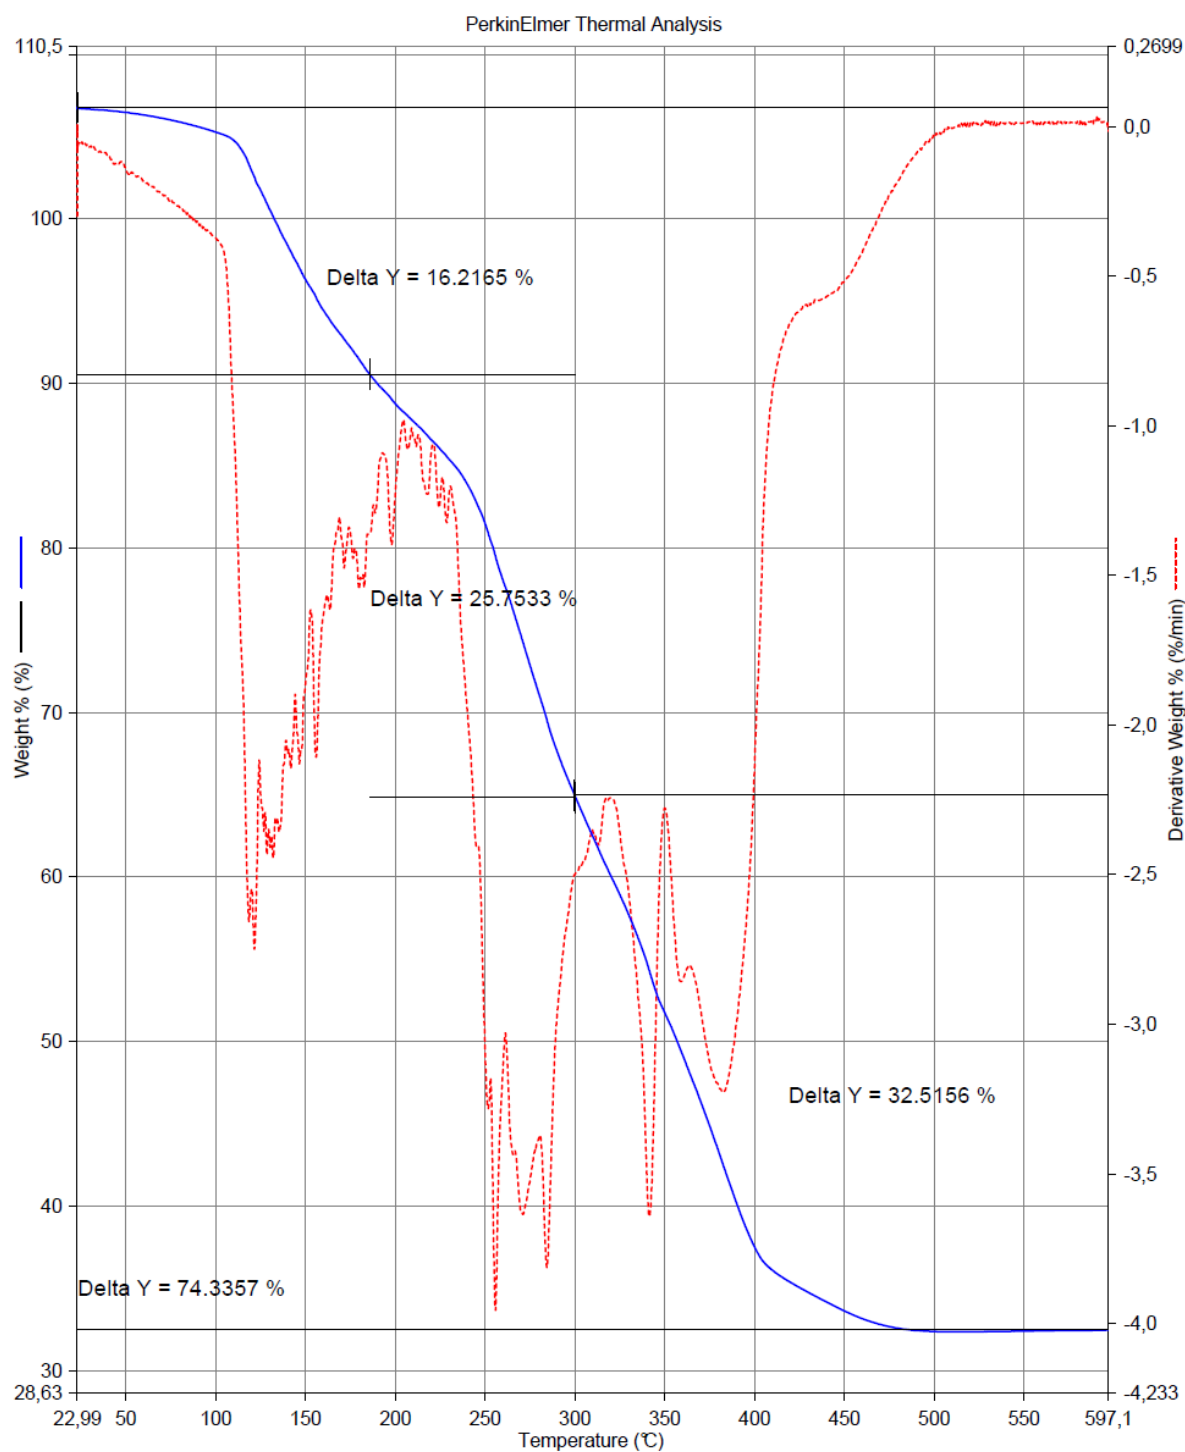

Figure FS5 X-ray powder pattern of the TiO<sub>2</sub> powder produced by heat treatment of TiBALDH at 500°C

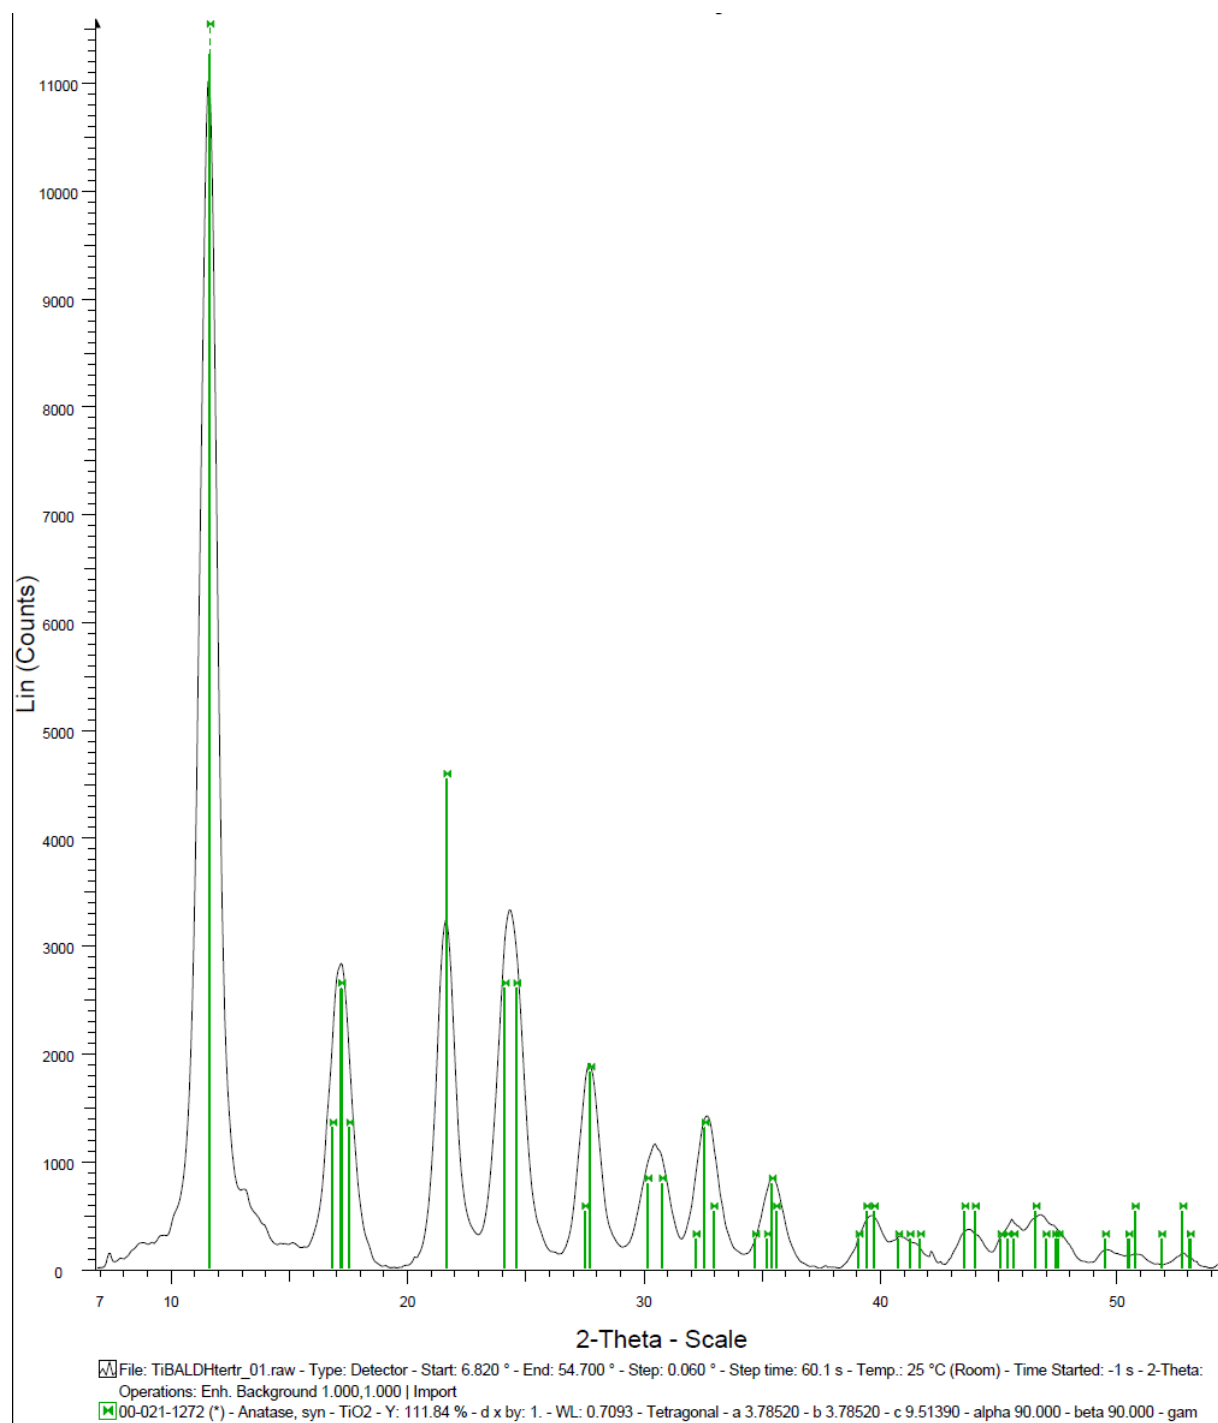

## Preparation of pollen suspension

A pollen suspension was prepared by collecting stamens of tobacco plants and putting them into a liquid medium. The pollen suspension was filtered through a colander to remove stamens and vacuum filtrated on a filter paper circles. Then filter papers were transferred onto a medium solidified with 0.5% phytigel in small Petri dishes. After removal of the filter paper circles, pollen remains on the surface of the solid medium. Pollen bombardment was performed immediately after plating.

Figure FS6 Working scheme for sample preparation in the shooting experiment:

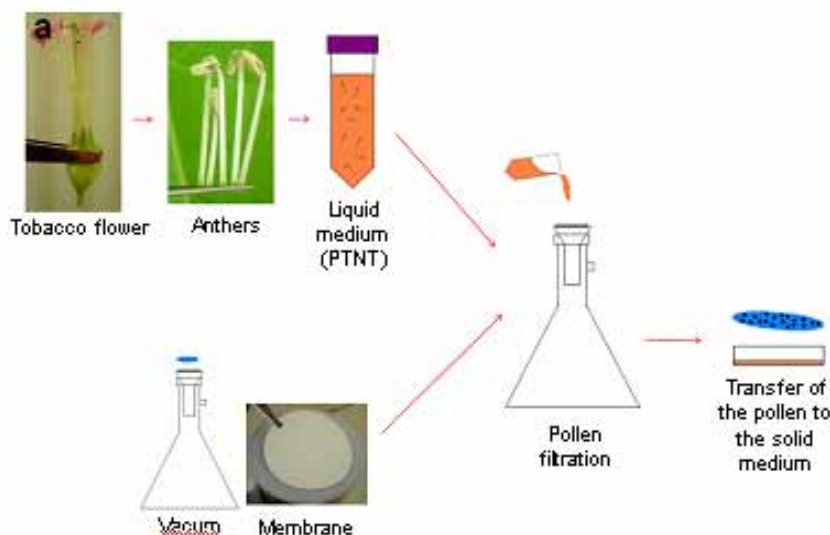

Figure FS7 The shooting a quantified portion of nanoparticles suspension using Bio-rad instrument

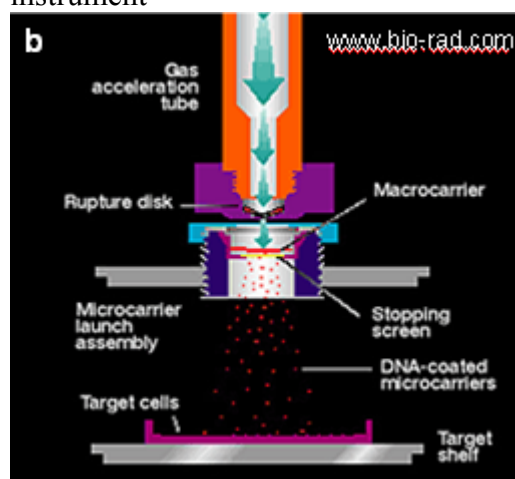

Supplement: c2ra20388j.pdf [file c2ra20388j.pdf]
